# Supplementary material for: 3D structure of the electric double layer of ionic liquid–alcohol mixtures at the electrochemical interface
Source: Royal Society of Chemistry journal article supplement (doi:10.1039/c8cp05632c), 2018-01-01
Supplement: c8cp05632c1.pdf [file c8cp05632c1.pdf]

**Electronic Supplementary Information for PCCP article:  
3D Structure of the Electric Double Layer of Ionic Liquid-Alcohol Mixtures at the  
Electrochemical Interface**

José M. Otero-Mato,<sup>1</sup> Hadrián Montes-Campos,<sup>1</sup> Oscar Cabeza,<sup>2</sup> Diddo Diddens,<sup>3</sup> Alina Ciach,<sup>4</sup> Luis J. Gallego,<sup>1</sup> and Luis M. Varela<sup>1, a)</sup>

<sup>1)</sup>*Grupo de Nanomateriais, Fotónica e Materia Branda,  
Departamento de Física de Partículas, Universidade de Santiago de Compostela,  
Campus Vida s/n E-15782, Santiago de Compostela, Spain*

<sup>2)</sup>*Facultade de Ciencias, Universidade da Coruña, Campus A Zapateira s/n E-15008,  
A Coruña, Spain*

<sup>3)</sup>*Helmholtz-Institute Münster (HI MS), Ionics in Energy Storage,  
Forschungszentrum Jülich GmbH, Corrensstraße 46, 48149 Münster,  
Germany*

<sup>4)</sup>*Institute of Physical Chemistry, Polish Academy of Sciences, Kasprzaka 44/52,  
01-224 Warszawa, Poland*

---

<sup>a)</sup>Electronic mail: [luismiguel.varela@usc.es](mailto:luismiguel.varela@usc.es)

## I. IONIC POSITIONS FLUCTUATIONS: THEORETICAL DESCRIPTION

Let's suppose a situation where the ions are forming a two-dimensional triangular lattice in an ionic layer close to the electrodes. In a first approximation, we can calculate the probability of finding a given ion out of its equilibrium position at  $\Delta\vec{r} = (\epsilon_x, \epsilon_y)$  (see Fig. A). This probability will be governed by the Boltzmann distribution. In our problem, the electrostatic potential energy plays a dominant role, so we can approximate this energy for the considered ion by the contributions of its first neighbours:

$$E_p = \frac{q^2}{4\pi\epsilon_r} \left( \frac{1}{\sqrt{\epsilon_x^2 + (\epsilon_y - a)^2}} + \frac{1}{\sqrt{\epsilon_x^2 + (\epsilon_y + a)^2}} + \frac{1}{\sqrt{(\epsilon_x - \frac{\sqrt{3}}{2}a)^2 + (\epsilon_y - \frac{1}{2}a)^2}} + \frac{1}{\sqrt{(\epsilon_x - \frac{\sqrt{3}}{2}a)^2 + (\epsilon_y + \frac{1}{2}a)^2}} + \frac{1}{\sqrt{(\epsilon_x + \frac{\sqrt{3}}{2}a)^2 + (\epsilon_y - \frac{1}{2}a)^2}} + \frac{1}{\sqrt{(\epsilon_x + \frac{\sqrt{3}}{2}a)^2 + (\epsilon_y + \frac{1}{2}a)^2}} \right), \quad (1)$$

where  $q$  is the charge of the ions,  $\epsilon_r$  the electric permittivity of the medium and  $a$  the lattice parameter of the model. It is straightforward to see that, since  $(0, 0)$  is a minimum of the potential, this expression can be approximated to the lowest order by:

$$E_p \approx \frac{3q^2}{2\pi\epsilon a} + \frac{9q^2(\epsilon_x^2 + \epsilon_y^2)}{8\pi\epsilon a^3} + O(\epsilon_x^4, \epsilon_y^4). \quad (2)$$

Using this approximation of the energy together with the Boltzmann distribution, the probability of finding an ion out of its equilibrium position can be approximated by:

$$p(\epsilon_x, \epsilon_y) = \frac{1}{Z} e^{-\frac{E_p}{k_B T}} \approx \frac{1}{Z} e^{-\frac{q^2}{k_B T \pi \epsilon a}} e^{-\frac{3q^2(\epsilon_x^2 + \epsilon_y^2)}{4\pi\epsilon a^3 k_B T}}, \quad (3)$$

where  $Z$  is the partition function,  $k_B$  the Boltzmann constant and  $T$  the temperature. As it can be seen, the probability of fluctuation in the positions of the ions is described by a Gaussian distribution function with the standard deviation

$$s_p = \frac{a^2}{q} \sqrt{\frac{2\pi\epsilon k_B T}{3a}} \propto \frac{\sqrt{T}\epsilon}{\sigma}, \quad (4)$$

where  $\sigma = q/a^2$  is the surface charge density.

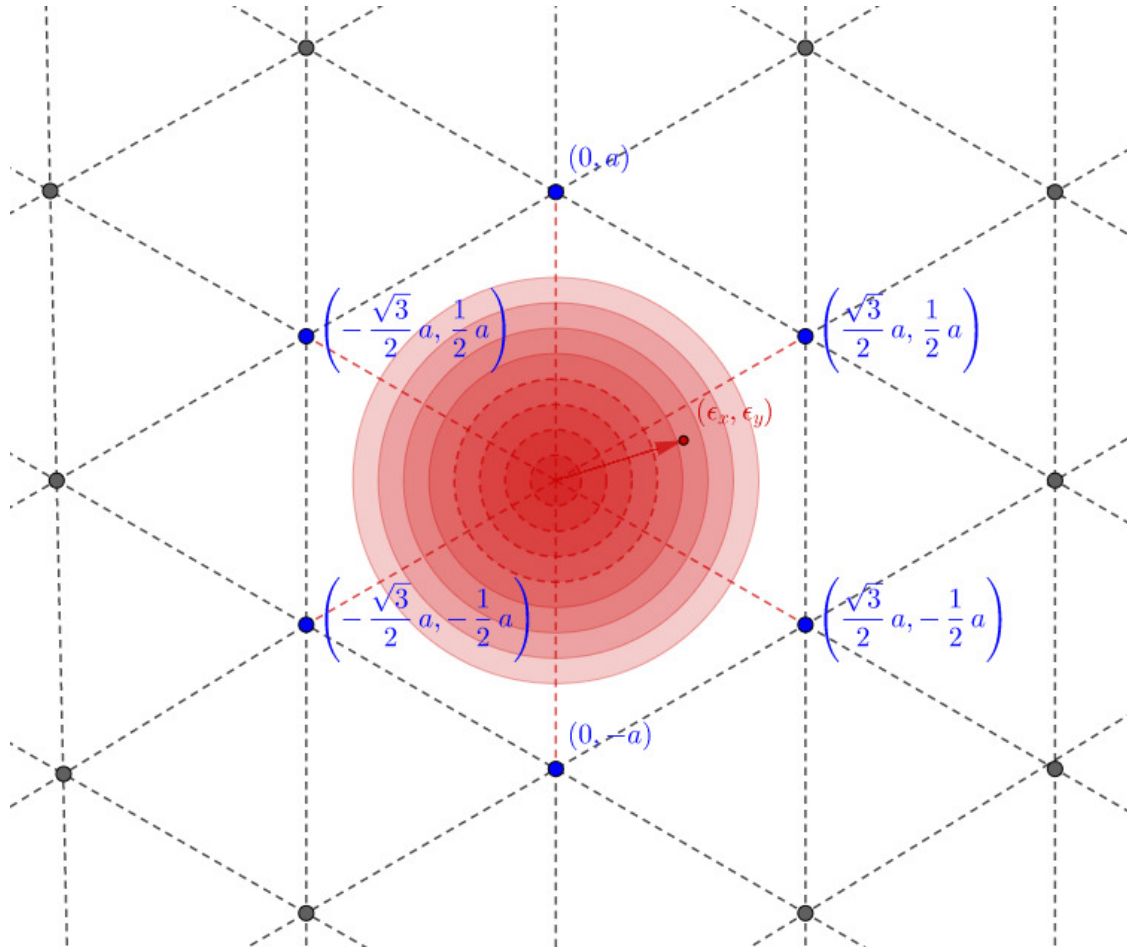

FIG. A: Scheme of the considered model for the calculation of the dispersion in the ionic position. The dots represents the ions positions, being  $a$  the lattice parameter. The considered ions for the energy calculation are those in blue.
